# Supplementary material
Source: PubMed Central journal article supplement (PMC2943939)
Supplement: Supp_Figure.pdf [file Supp_Figure.pdf]

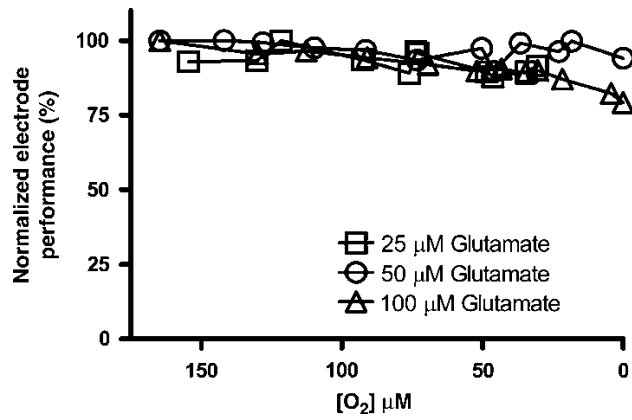

**SUPPLEMENTARY FIG. 1.** Glutamate microelectrode arrays (MEAs) performance was relatively insensitive to the oxygen concentration. The response of the MEAs to various concentrations of glutamate was measured at decreasing oxygen concentrations. The MEAs responses were normalized to the air-saturated MEAs response (200 μM oxygen). Oxygen concentrations were measured using an isolated, dissolved oxygen meter.
